# Supplementary material
Source: Research Square preprint supplement (doi:10.21203/rs.3.rs-9768915/v1)
Supplement: Supplementary file 1 [file b428cf52164221c63987a53e.docx]

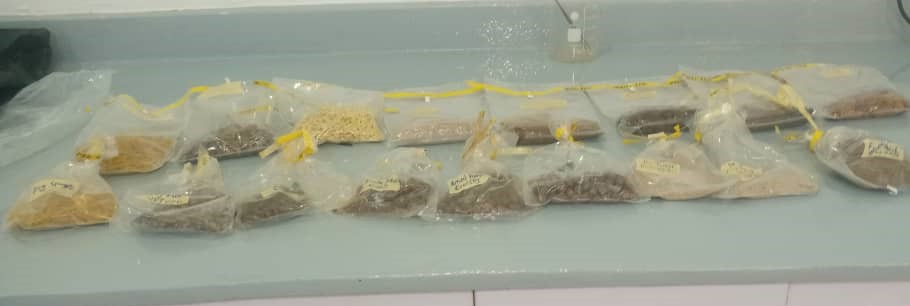


**Plate 1- Dog food samples collected**


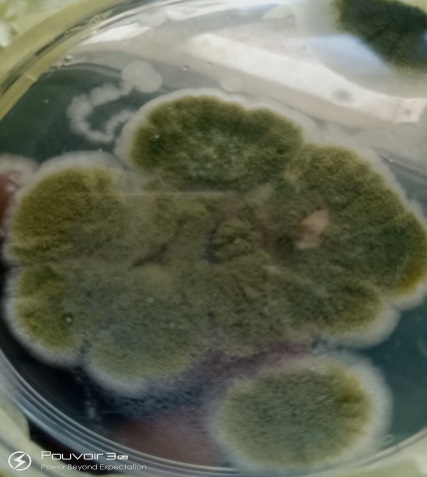


**Plate 2- Colonies of *Aspergillus parasiticus* (presumptive)on PDA (Obverse)**


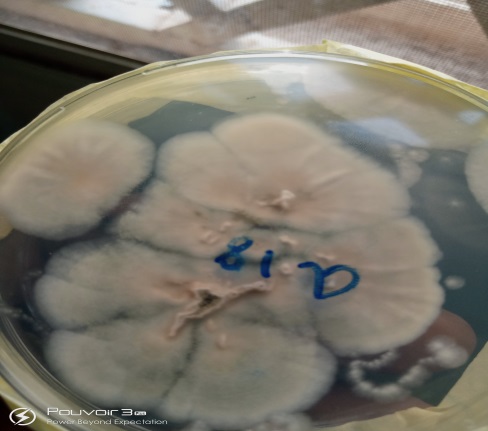


**Plate 3 - Colonies of *Aspergillus parasiticus* (presumptive)on PDA (Reverse)**


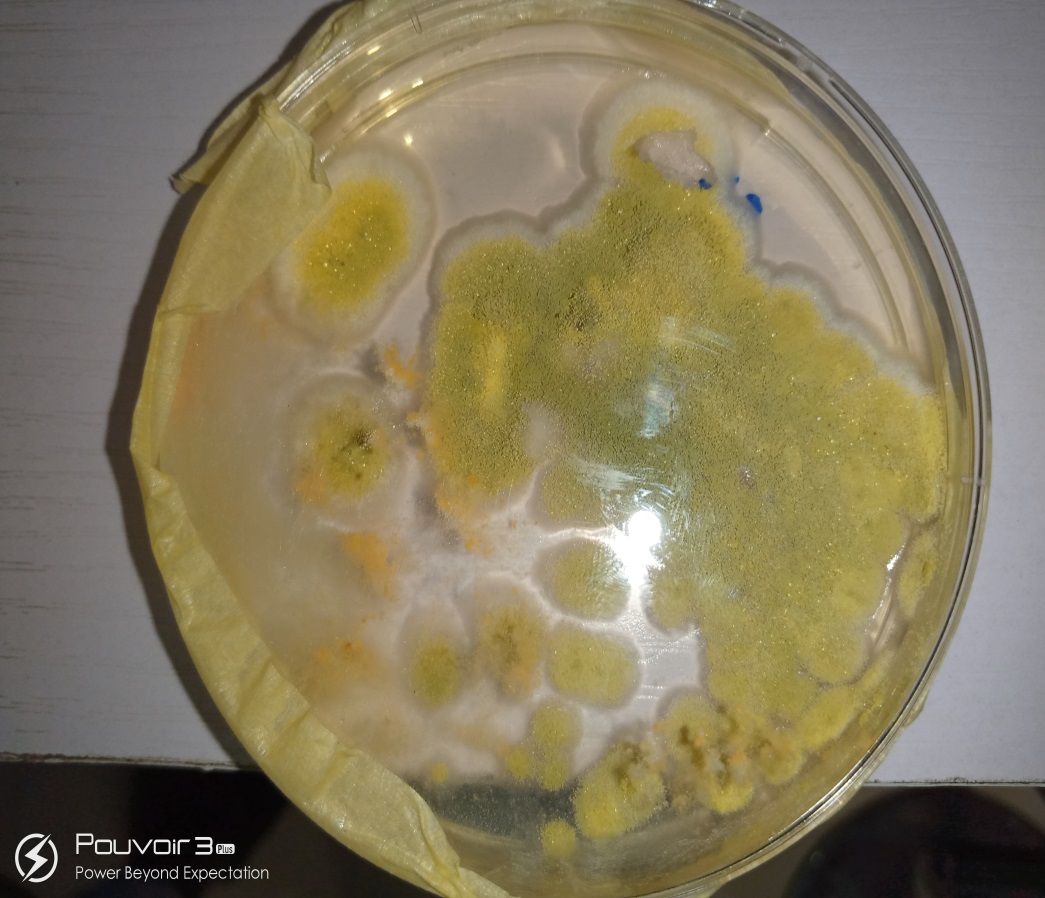


**Picture 4- Colonies of *Aspergillus flavus* (presumptive)on PDA (Obverse)**


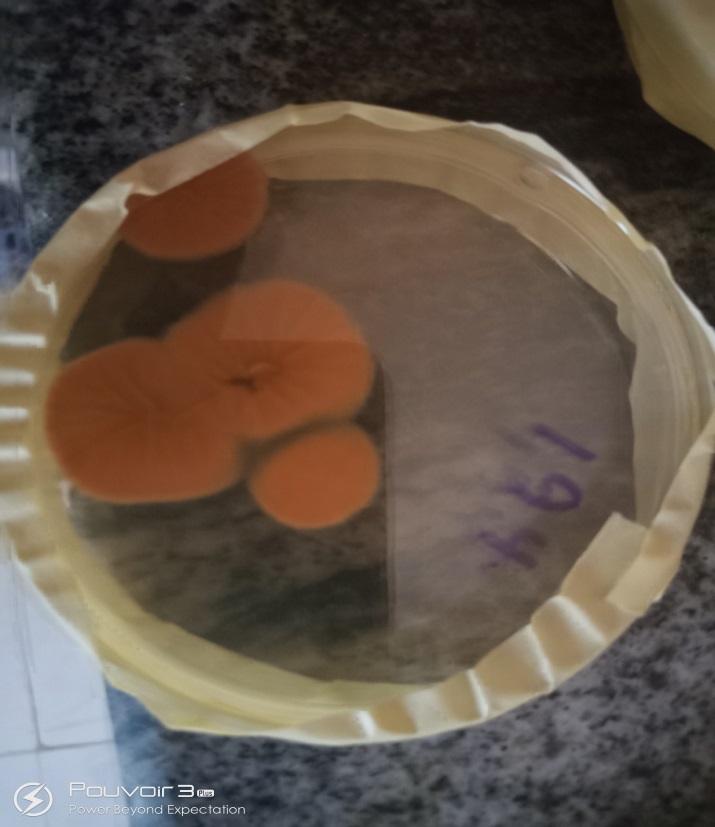


**Plate 5 - Positive isolates of *AFPA* on AFPA Agar**


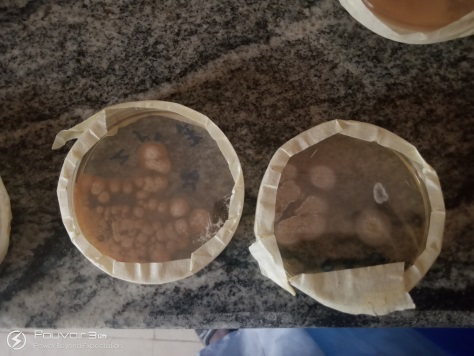


**Plate 6 - Negative isolates on AFPA Agar**


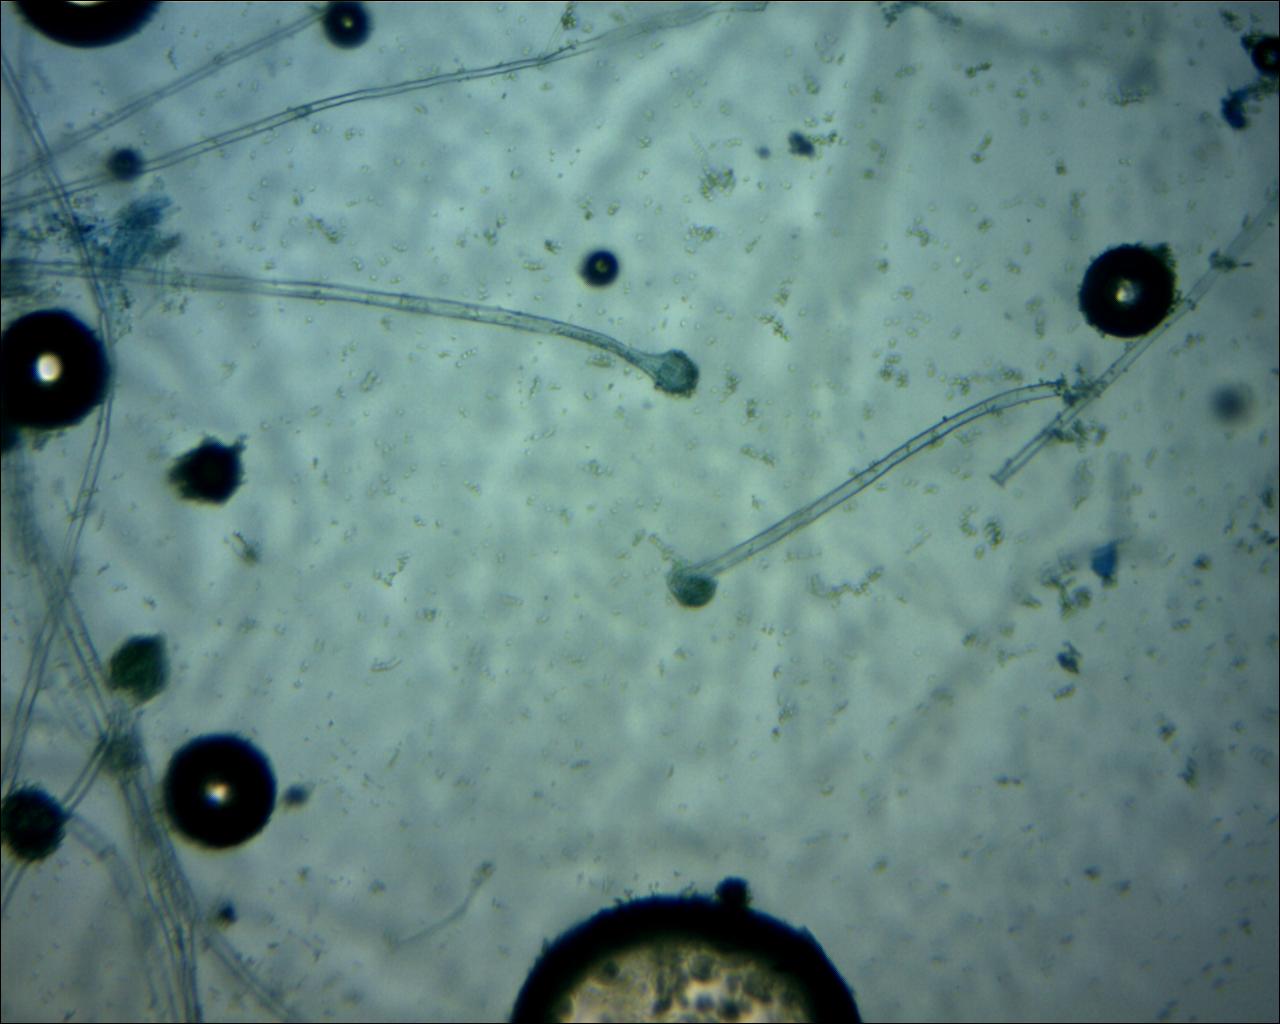


**Plate 7 - Microscopic image of *A. flavus* showing long non-septate hyphae and dome shaped vesicle x100 LCP**


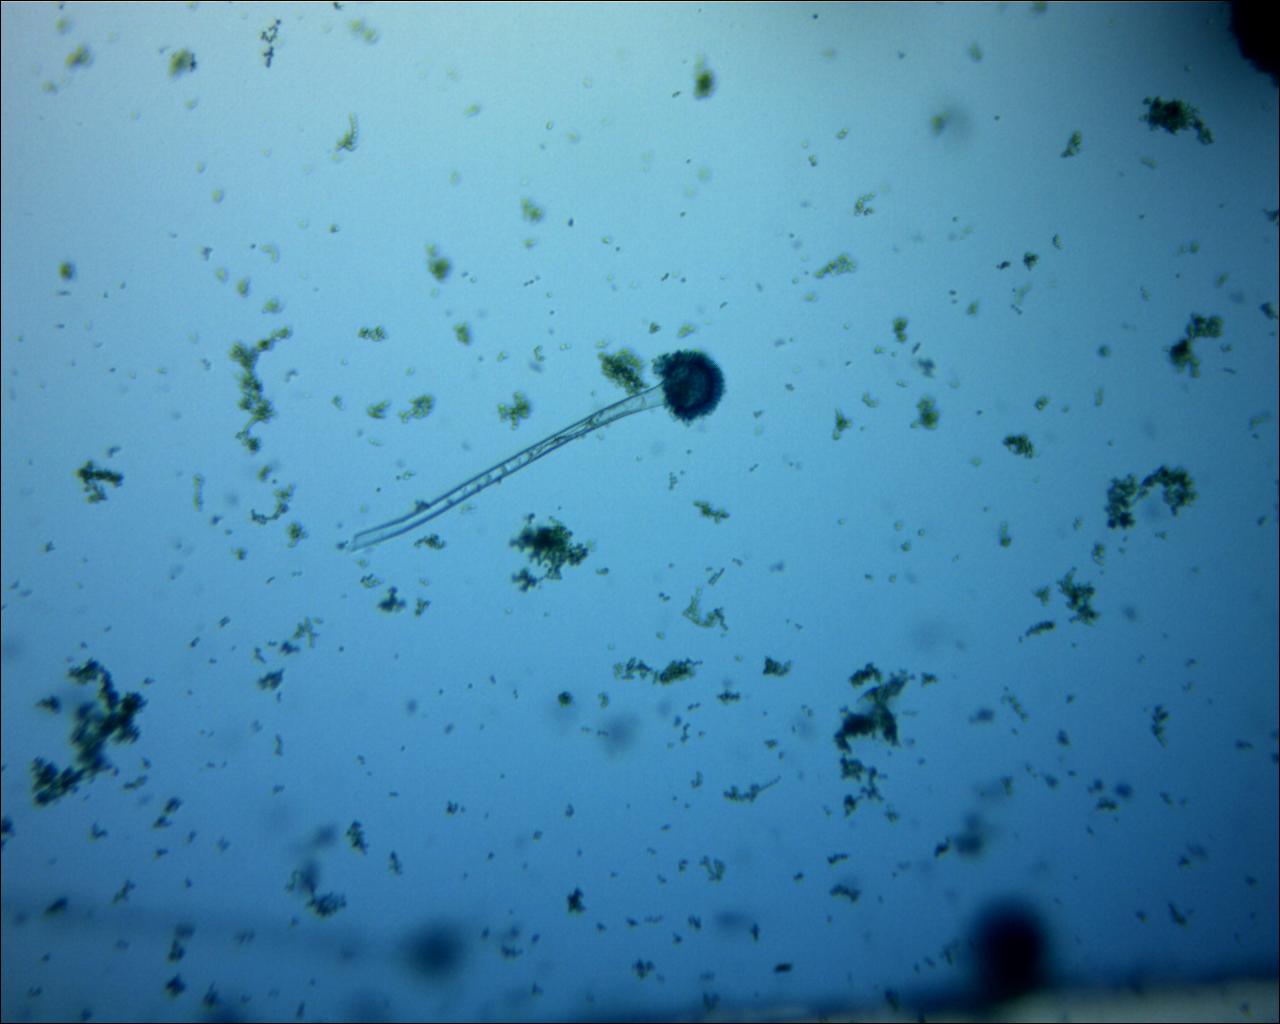


Plate 8 - Microscopic image of*A. Parasiticus* –long and rough hyphae with globose radiating head x100 LCP


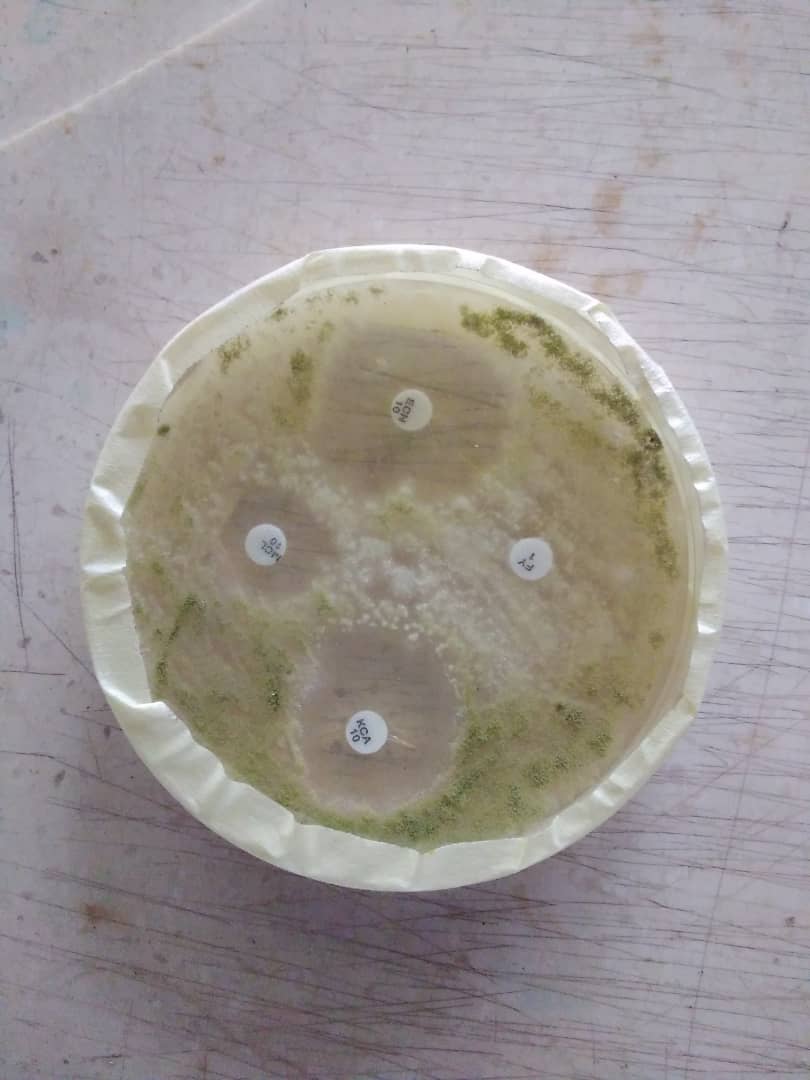


Plate 9 – Zone on inhibition
